1 **Population sequencing reveals clonal diversity and ancestral inbreeding**  
2 **in the grapevine cultivar Chardonnay**

3 **Short Title: Chardonnay genome reveals clonal diversity and ancestral inbreeding**

4 Michael J. Roach<sup>1</sup>, Daniel L. Johnson<sup>1</sup>, Joerg Bohlmann<sup>2</sup>, Hennie J.J. van Vuuren<sup>2,3</sup>, Steven  
5 J. M. Jones<sup>4</sup>, Isak S. Pretorius<sup>5</sup>, Simon A. Schmidt<sup>1#\*</sup> and Anthony R. Borneman<sup>1,6#\*</sup>

6 1. The Australian Wine Research Institute, PO Box 197, Glen Osmond, South Australia,  
7 5046, Australia

8 2. Michael Smith Laboratories, The University of British Columbia, Vancouver, British  
9 Columbia, Canada

10 3. Wine Research Centre, Faculty of Land and Food Systems, University of British  
11 Columbia, Vancouver, British Columbia, BC V6T 1Z4, Canada.

12 4. Michael Smith Genome Sciences Centre, British Columbia Cancer Research Centre,  
13 Vancouver, British Columbia, BC V6T 1Z4, Canada.

14 5. Chancellery, Macquarie University, Sydney, New South Wales, 2109. Australia

15 6. Department of Genetics and Evolution, University of Adelaide, South Australia, 5000,  
16 Australia

17 #Authors contributed equally to this work

18 \*Address correspondence to:

19 Dr. Simon Schmidt; +61 8 8313 6600; [simon.schmidt@awri.com.au](mailto:simon.schmidt@awri.com.au)

20 Dr. Anthony Borneman; +61 8 8313 6600; [anthony.borneman@awri.com.au](mailto:anthony.borneman@awri.com.au)

## 21 **Abstract**

22 Chardonnay is the basis of some of the world's most iconic wines and its success is  
23 underpinned by a historic program of clonal selection. There are numerous clones of  
24 Chardonnay available that exhibit differences in key viticultural and oenological traits that  
25 have arisen from the accumulation of somatic mutations during centuries of asexual  
26 propagation. However, the genetic variation that underlies these differences remains largely  
27 unknown. To address this knowledge gap, a high-quality, diploid-phased Chardonnay  
28 genome assembly was produced from single-molecule real time sequencing, and combined  
29 with re-sequencing data from 15 different commercial Chardonnay clones. There were 1620  
30 markers identified that distinguish the 15 Chardonnay clones. These markers were reliably  
31 used for clonal identification of validation genomic material, as well as in identifying a  
32 potential genetic basis for some clonal phenotypic differences. The predicted parentage of  
33 the Chardonnay haplotypes was elucidated by mapping sequence data from the predicted  
34 parents of Chardonnay (Gouais blanc and Pinot noir) against the Chardonnay reference  
35 genome. This enabled the detection of instances of heterosis, with differentially-expanded  
36 gene families being inherited from the parents of Chardonnay. Most surprisingly however,  
37 the patterns of nucleotide variation present in the Chardonnay genome indicate that Pinot  
38 noir and Gouais blanc share an extremely high degree of kinship that has resulted in the  
39 Chardonnay genome displaying characteristics that are indicative of inbreeding.

## 40 **Author Summary**

41 Phenotypic variation within a grapevine cultivar arises from an accumulation of mutations  
42 from serial vegetative propagation. Old cultivars such as Chardonnay have been propagated  
43 for centuries resulting in hundreds of available 'clones' containing unique genetic mutations  
44 and a range of various phenotypic peculiarities. The genetic mutations can be leveraged as  
45 genetic markers and are useful in identifying specific clones for authenticity testing, or as  
46 breeding markers for new clonal selections where particular mutations are known to confer a

47 phenotypic trait. We produced a high-quality genome assembly for Chardonnay, and using  
48 re-sequencing data for 15 popular clones, were able to identify a large selection of markers  
49 that are unique to at least one clone. We identified mutations that may confer phenotypic  
50 effects, and were able to identify clones from material independently sourced from nurseries  
51 and vineyards. The marker detection framework we describe for authenticity testing would  
52 be applicable to other grapevine cultivars or even other agriculturally important woody-plant  
53 crops that are vegetatively propagated such as fruit orchards. Finally, we show that the  
54 Chardonnay genome contains extensive evidence for parental inbreeding, such that its  
55 parents, Gouais blanc and Pinot noir, may even represent first-degree relatives.

## 56 **Introduction**

57 Chardonnay is known for the production of some of the world's most iconic wines and is  
58 predicted to be the result of a cross between the *Vitis vinifera* cultivars Pinot noir and Gouais  
59 blanc (1, 2). Since first appearing in European vineyards, Chardonnay has spread  
60 throughout the world and has become one of the most widely cultivated wine-grape varieties  
61 (3). For much of the 20<sup>th</sup> century, grapevine cultivars were generally propagated by mass  
62 selection. High genetic variability therefore existed between individual plants within a single  
63 vineyard and this heterogeneity often lead to inconsistent fruit quality, production levels, and  
64 in some wine-producing regions, poor vine health (4). Clonal selection arose as a technique  
65 to combat these shortcomings, preserving the genetic profile of superior plants, while  
66 amplifying favourable characteristics and purging viral contamination, leading to improved  
67 yields (4, 5).

68 Chardonnay's global expansion throughout commercial vineyards, which started to  
69 accelerate rapidly in the mid-1980s, coincided with the maturation of several clonal selection  
70 programmes based in France, the USA and Australia. As a result, there are now many  
71 defined clones of Chardonnay available that exhibit differences in key viticultural and

72 oenological traits (3, 6-11). For example, clone I10V1—also known as FPS06 (12)—showed  
73 early promise as a high-yielding clone with moderate cluster weight and vigorous  
74 canopy (13). The availability of virus-free clonal material of I10V1 helped cement productivity  
75 gains in the viticultural sector and I10V1 quickly dominated the majority of the Australian  
76 Chardonnay plantings (4, 5).

77 Since the concurrent publication of two draft Pinot noir genomes in 2007 (14, 15) grapevine  
78 genomics has increasingly contributed to the understanding of this woody plant species.  
79 However, the haploid Pinot noir reference genome does not fully represent the typical  
80 complexity of commercial wine-grape cultivars and the heterozygous Pinot noir sequence  
81 remains highly fragmented (16). In recent years, the maturation of single molecule long-read  
82 sequencing technology such as those developed by PacBio (17) and Oxford Nanopore (18),  
83 and the development of diploid-aware assemblers such as FALCON (19) and CANU (20)  
84 has given rise to many highly-contiguous genome assemblies, including a draft genome  
85 assembly for the grapevine variety Cabernet sauvignon (19, 21-24). Furthermore, whole  
86 genome phasing at the assembly level is possible with assemblers such as FALCON  
87 Unzip (19), allowing both haplotypes of a diploid organism to be characterised. For  
88 heterozygous diploid organisms, such as Chardonnay, this is especially important for  
89 resolving haplotype-specific features that might otherwise be lost in a traditional genome  
90 assembly.

91 The aim of this work was to explore the diversity extant within Chardonnay clones. A  
92 reference genome for Chardonnay was assembled *de novo* from PacBio long-read  
93 sequence data against which short-read clonal sequence data was mapped. This led to the  
94 identification of clone diagnostic single-nucleotide polymorphisms (SNP) and  
95 Insertions/Deletions (InDel) that show little shared clonal heritage. Furthermore, comparison  
96 of the Chardonnay reference with Pinot noir revealed some unexpected complexities in  
97 haplotype features with implications for the pedigree of this important grapevine variety.

## 98 **Results**

### 99 **Assembly and annotation of a high quality, heterozygous phased Chardonnay** 100 **genome**

101 Of the many Chardonnay clones available, clone I10V1 was chosen as the basis for the  
102 reference genome due to its prominent use in the Australian wine industry. The initial I10V1  
103 genome was assembled, phased and polished using subreads generated from 54 PacBio  
104 RS-II SMRT cells and the FALCON Unzip, Quiver pipeline (19, 25). While this assembly  
105 method should produce an assembly in which the primary contigs represent the haploid  
106 genome content of the organism in question, the size of the initial assembly (580 Mb)  
107 significantly exceeded that expected for *V. vinifera* (450–500 Mb). Both analysis with  
108 BUSCO (26) and short-read mapping indicated that this increased size was primarily due to  
109 both copies of many genomic regions (rather than only a single haplotype) being  
110 represented in the primary contigs (S1 Table and S2 Fig), a situation that is common in  
111 heterozygous diploid genome assemblies (19, 27-29). To address these assembly artefacts,  
112 the initial primary contig pool was aggressively de-duplicated, with small primary contigs that  
113 were allelic to larger primary contigs being re-assigned to the haplotig pool. This approach  
114 reassigned 694 primary contigs (100 Mb) and added 36 haplotigs (11 Mb), while also  
115 purging 18 repeat-rich artefactual contigs (1.3 Mb). Manual curation, based upon alignments  
116 to the PN40024 assembly (14) and subread mapping were used to address several  
117 remaining mis-assemblies.

118 The final curated Chardonnay assembly consists of 854 primary contigs ( $N_{50}$  of 935 kb) and  
119 1883 haplotigs, totalling 490 Mb and 378 Mb, respectively (Table 1). There were  
120 approximately 95% complete, and only 1.6% fragmented BUSCO-predicted genes  
121 (Supplementary Table S1). BUSCO duplication is also predicted to be low for both the  
122 primary contigs and the associated haplotigs (4% and 2% respectively). A custom repeat

123 library was constructed for Chardonnay and used to annotate 336 Mb (38.7%) of the diploid  
124 genome as repetitive. RNAseq data were used to annotate potential coding regions of the  
125 primary contigs using Maker (30), which predicted 29 675 gene models (exclusive of  
126 repetitive regions) and 66 548 transcripts in total.

127 **Table 1: Quast-based assembly statistics for the Chardonnay clone I10V1 genome**

|                     | Primary contigs | Haplotigs |
|---------------------|-----------------|-----------|
| Contigs             | 854             | 1883      |
| Contigs (>= 50 kb)  | 838             | 1614      |
| Assembly Size (Mb)  | 490.0           | 378.0     |
| Largest Contig (Mb) | 6.35            | 1.91      |
| GC (%)              | 34.41           | 34.45     |
| N50 (kb)            | 935.8           | 318.4     |
| N75 (kb)            | 502.7           | 165.3     |
| L50                 | 145             | 335       |
| L75                 | 321             | 749       |

128

### 129 **Phasing coverage, and identification of homozygous and hemizygous regions**

130 A total of 614 primary contigs (397 Mb) and 1502 haplotigs (305 Mb) were confidently placed  
131 in chromosomal order using the PN40024 scaffold as a reference. To analyse the degree  
132 and distribution of heterozygosity across the genome, read depth (from mapped RS II  
133 subreads), heterozygous variant density (from mapped Illumina short-reads) and phasing  
134 coverage (from contig alignments) was calculated for the assembly (Fig 1A).

135 Chromosomes 2, 3, 7, 15, 17, and 18 contain runs of homozygosity greater than 500 kb  
136 (intersect of lack of phasing coverage, double read-depth, low heterozygous variant density).  
137 There are a further 22.8 Mb that lacked phasing coverage, had low heterozygous variant  
138 density, and median read-depth. These regions presumably result from either hemizyosity  
139 of these genomic regions, or undetected allelic duplicates remaining in the primary contigs.

140 The largest homozygous run identified resides on Chromosome 2 and aligns closely to the  
141 Pinot noir assembly at over 99.8% identity (Fig 1B). A region of synteny remaining in the  
142 primary contigs is present (CH.chr2:5570000– 6520000), evidenced by the ends of  
143 neighbouring primary contigs aligning to the same region in Pinot noir. In addition, there  
144 were two regions of low heterozygous variant density, poor phasing coverage, and median  
145 read-depth (CH.chr2:99000000–10300000 and CH.chr2:11450000–12600000). BLAST  
146 searches for these regions within the remaining primary contigs and haplotigs did not reveal  
147 any significant alignments. As such these regions appear to be hemizygous.

### 148 **Defining parental contributions to the Chardonnay genome**

149 To further refine the relationship between Chardonnay and the two varieties previously  
150 reported to be its parents (1, 2, 31), an attempt was made to identify the parental origin of  
151 each allele in the diploid Chardonnay assembly. Phase blocks were assigned across the  
152 genome by aligning and trimming both the primary contigs and haplotigs into pairs of  
153 syntenic sequence blocks (P and H alleles). This produced 1153 phase-blocks covering  
154 270 Mb of the genome (55%). Each pair of phase blocks should have one allele inherited  
155 from each parent. To assign likely genomic parentage within each phase block, short-reads  
156 from Gouais blanc, and a merged dataset comprising sequencing reads from several  
157 different Pinot varieties (32) (hereafter referred to as Pinot) were mapped to the phase block  
158 sequences. The proportion of inherited nucleotide variation (using heterozygous variant loci)  
159 was then used to attribute the likely parentage of each block.

160 It was possible to confidently assign parentage to 197 Mb of the 244 Mb of chromosome-  
161 ordered phase-blocks (Fig 2A). Interestingly, rather than a 1:1 ratio of Gouais blanc to Pinot  
162 matches, Pinot was shown to match a higher proportion of the phase blocks (49% versus  
163 34% Gouais blanc), suggesting that the Pinot noir genome has contributed a higher  
164 proportion of genetic material to Chardonnay than Gouais blanc. However, further  
165 complicating this imbalance was the observation that in the remaining 17% of assigned

166 regions, the pattern of nucleotide variation across the two heterozygous Chardonnay  
167 haplotypes matched both haplotypes of Pinot, with one of these haplotypes also matching  
168 one of the Gouais haplotypes. These 'double Pinot haplotype' regions are in some cases  
169 many megabases in size and are indicative of a common ancestry between Pinot and  
170 Gouais blanc.

171 While reciprocity (one Gouais blanc haplotype, one Pinot haplotype) was observed between  
172 allelic phase-blocks for over 95% of the parentage-assigned sequence, frequent haplotype  
173 switching (a known characteristic of FALCON-based assemblies) was observed between the  
174 haplomes, producing a haplotype mosaic which is observable as a 'checkerboard' pattern  
175 that alternates between the primary contigs and haplotigs for each chromosome (Fig 2B).



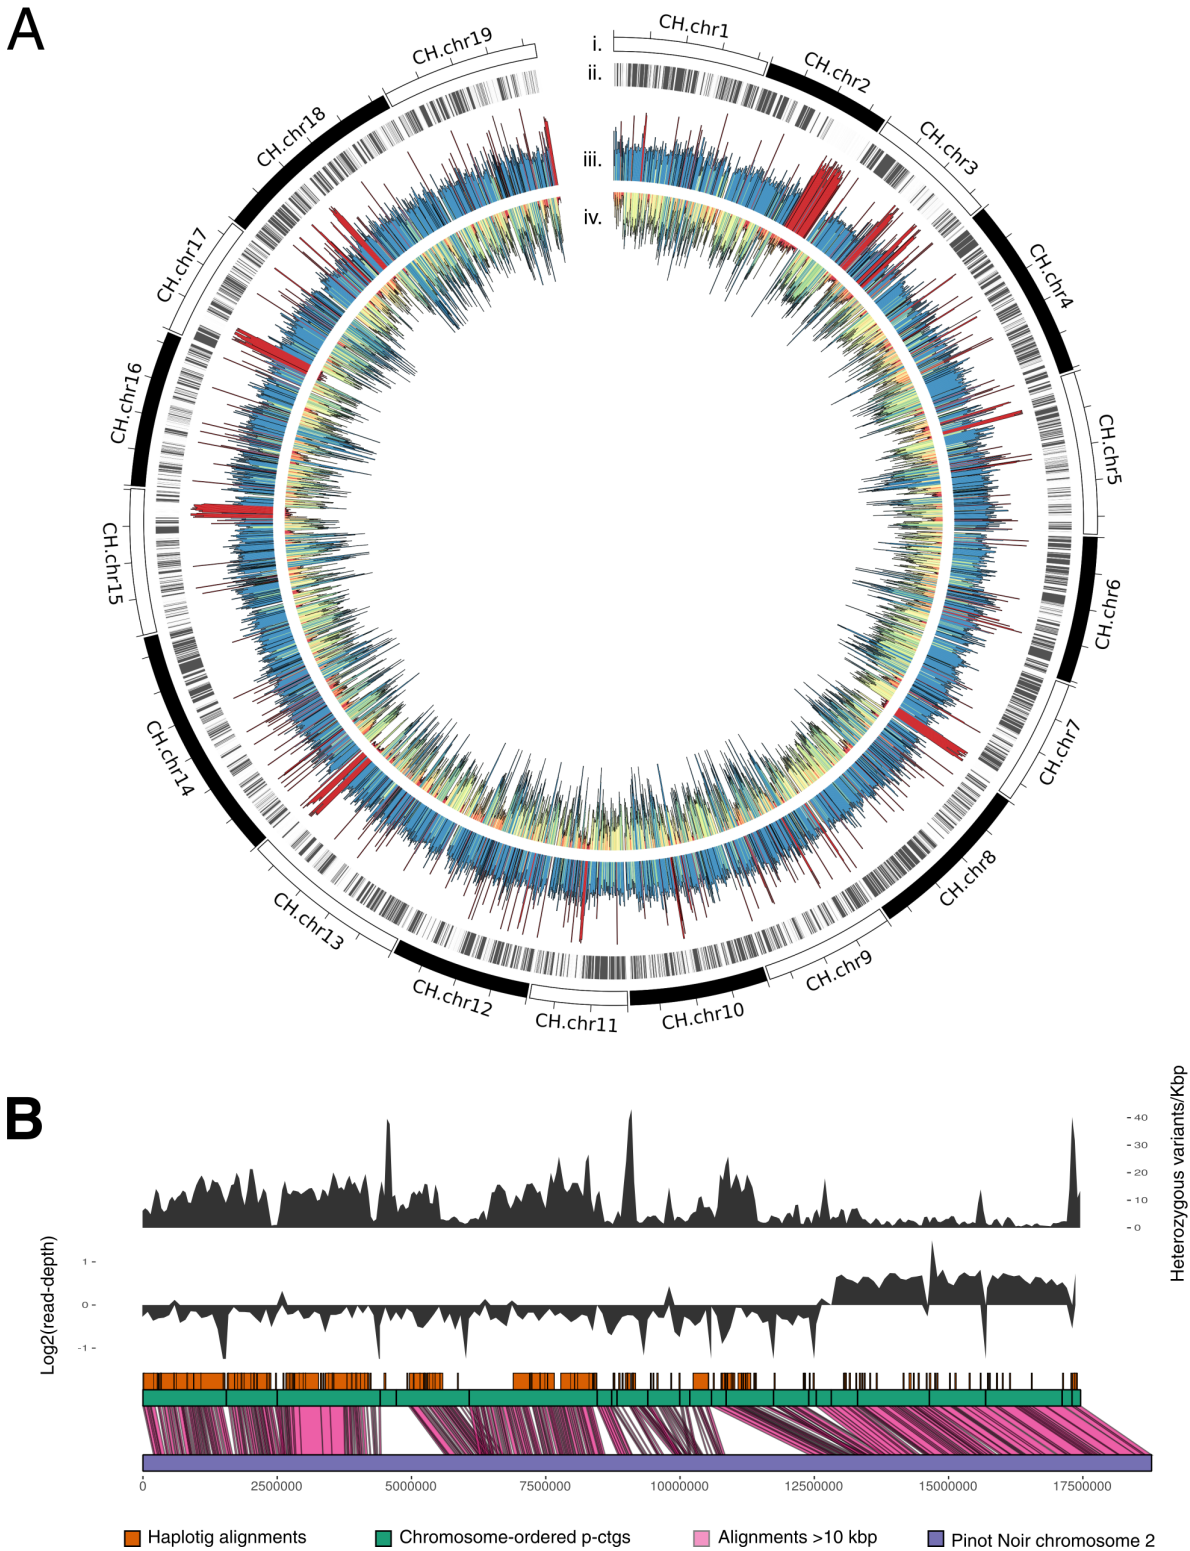

**Fig 1. The *Vitis vinifera* cultivar Chardonnay reference genome.** (A) A circos plot showing chromosome-ordered primary contigs (i), haplotig alignments (ii), read-depth of RS II subreads mapped to diploid assembly (read-depth colour scale: yellow, low; blue, high; red, double) (iii), and heterozygous variant density (SNP density colour scale: red, low; blue, high) (iv). (B) An expanded view of Chardonnay Chromosome 2 showing heterozygous variant density (top track), log<sub>2</sub> read-depth (middle track), and alignment with Pinot noir Chromosome 2 (bottom track).

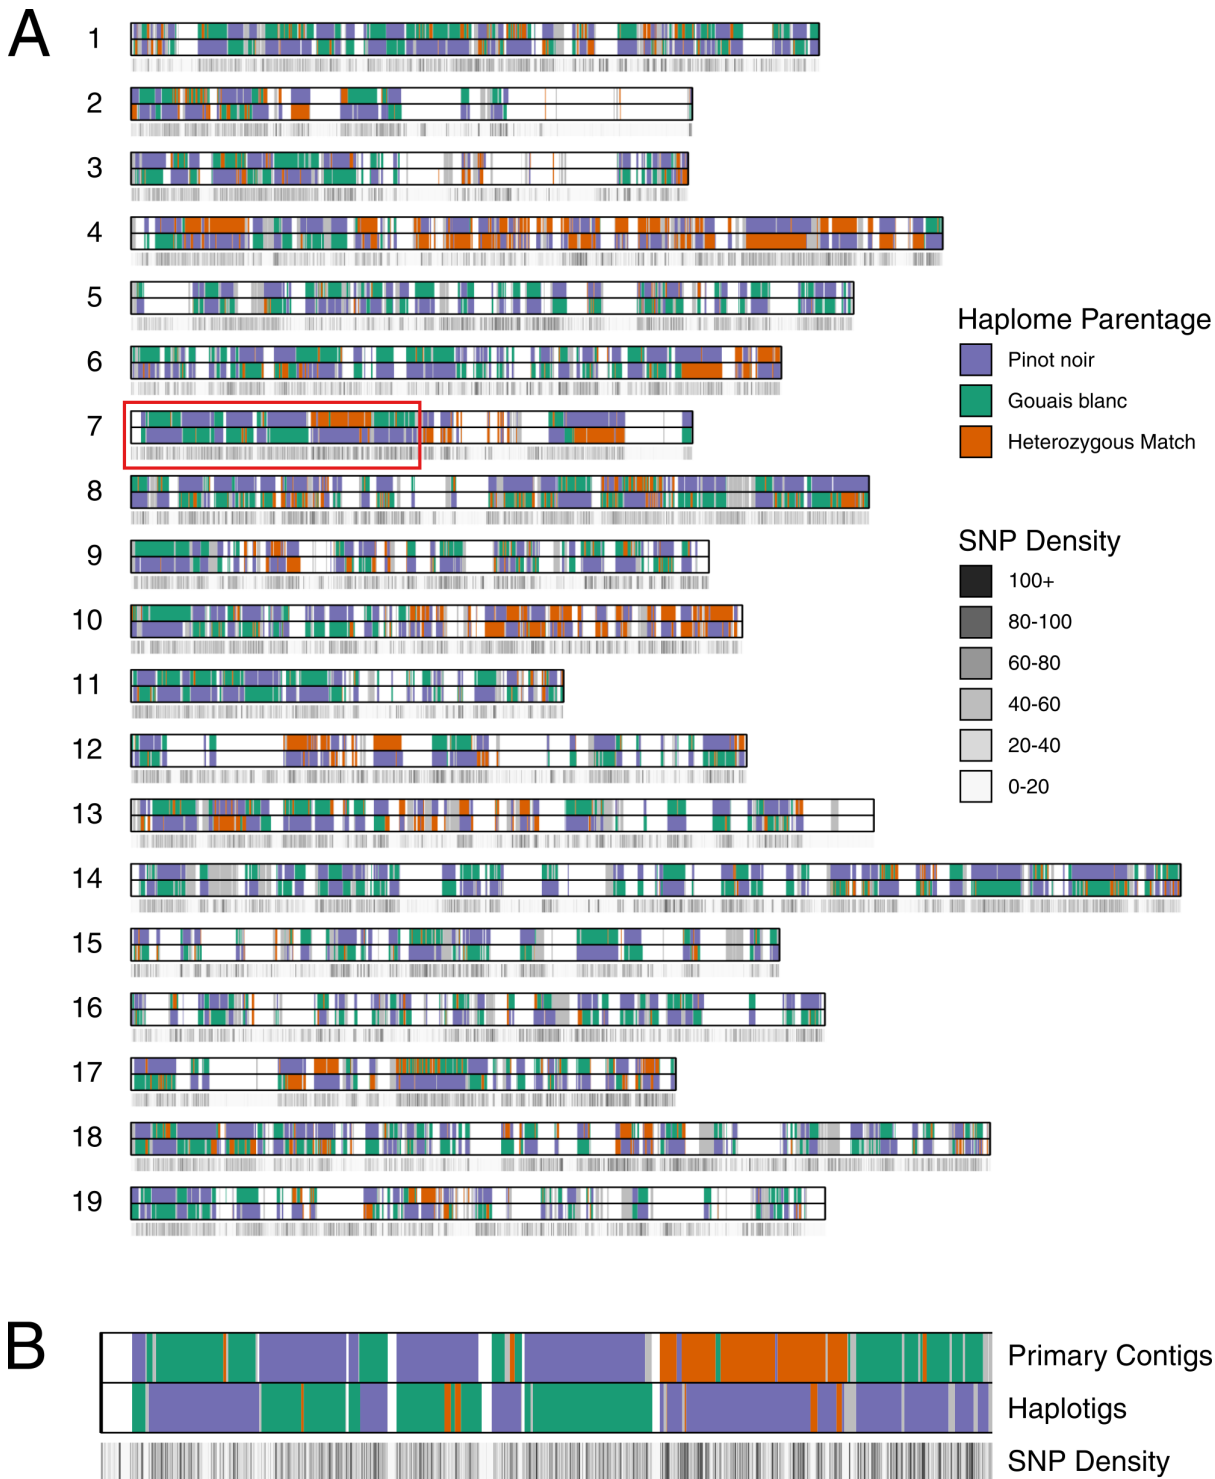

3

4 **Fig 2. Parental architecture of the Chardonnay genome.** (A) An ideogram of the Chardonnay reference  
5 assembly with the positions of both primary contig and haplotig phase-blocks indicated and juxtaposed with  
6 a SNP density track (for the primary contigs). Gaps in phase-blocks are indicated in white. (B) An  
7 enlargement of a region of *Vitis vinifera* Chromosome 7 (red box) in Figure 2A.

## 188 **Parental-specific genomic variation**

189 With parental contributions delineated in the Chardonnay assembly, it was possible to  
190 determine the parental origins of structural variation between orthologous chromosomes,  
191 including parent-specific gene family expansions. Tandem pairs of orthologous proteins were  
192 defined in Chardonnay and filtered to identify tandem orthologs that were both expanded in  
193 Chardonnay compared to the Pinot noir reference assembly, and which resided in the  
194 Gouais blanc haplome. Chromosome alignments containing gene expansion candidates  
195 were inspected for features consistent with tandem gene duplication. Using this analysis, an  
196 expansion of Fatty Acyl-CoA Reductase 2-like (*FAR2-like*) genes on Chromosome 5 was  
197 identified, with the arrangement of *FAR2-like* open reading frames (ORFs) consistent with a  
198 tandem duplication event (S3 Fig).

199 A protein-based phylogeny was produced that encompassed the four *FAR2-like* ORFs  
200 present in the Chardonnay assembly, in addition to the homologous proteins from the Pinot  
201 noir PN40024 assembly (Fig 3A). Using these data, the Chardonnay haplotig sequence was  
202 identified as being derived from Pinot (nucleotide sequences of *FAR2-like* genes from Pinot  
203 noir and the Chardonnay haplotig were identical). However, rather than having an  
204 orthologous set of protein-coding regions, the genomic sequence derived from Gouais blanc  
205 (present in the primary contig) is predicted to encode two additional copies of *FAR2-like*  
206 homologues and an extra *FAR2-like* pseudogene (Fig 3B). While the ORF that was  
207 orthologous to the Pinot *FAR2-like* gene was closely related to the Pinot noir *FAR2-like* gene  
208 (98% identity), the two additional ORFs from Gouais blanc were more distantly related (93–  
209 94% identity), suggesting that this gene expansion was not a recent event.

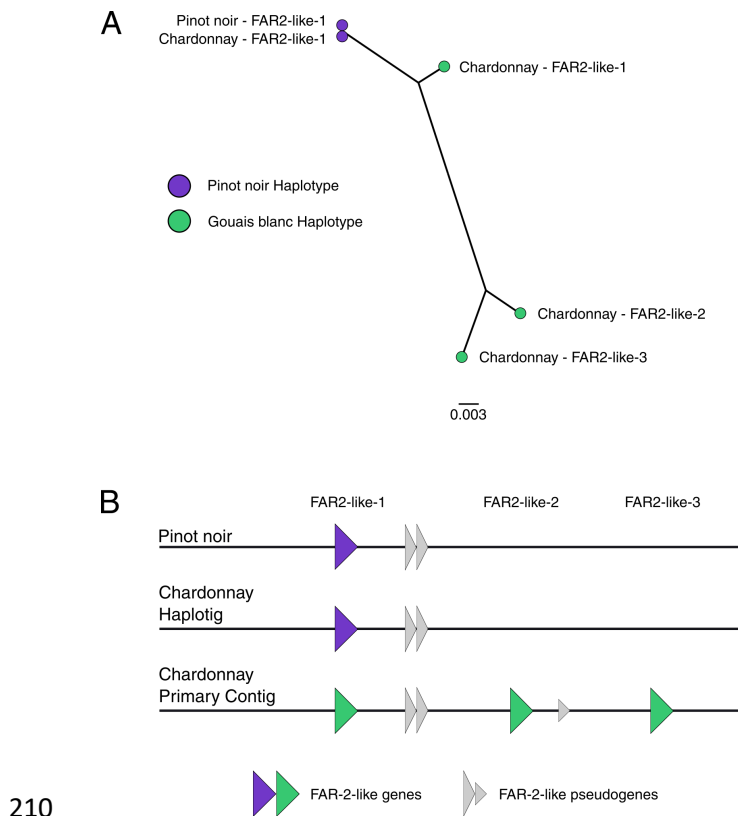

210

211 **Fig 3. A FAR2-like expanded gene family in Chardonnay.** (A) An unrooted tree of  
212 *FAR2-like* genes. (B) A schematic of the predicted genomic arrangement of the *FAR2-like*  
213 genes in Chardonnay. Both Pinot noir-derived (purple) and Gouais blanc-derived genes  
214 (green) are shown.

### 215 **Clonal nucleotide variation within a grapevine cultivar**

216 As for many commercial grapevine varieties, there are currently many clones of  
217 Chardonnay, with each exhibiting a unique range of phenotypic traits. However, unlike  
218 varietal development, all of these genetic clones were established through the repeated  
219 asexual propagation of cuttings that presumably trace back to an original Chardonnay plant.  
220 It is therefore an accumulation of somatic mutations, that has contributed to phenotypic  
221 differences that uniquely define each clone and which provide an avenue for the  
222 confirmation of a clone's identity. While clonal variation has so far been ill-defined in  
223 grapevine, the availability of the Chardonnay reference genome provides an opportunity to

224 investigate the SNP spectrum that has arisen during the long history of Chardonnay  
225 propagation.

226 To begin to catalogue the diversity that exists across the clonal landscape of Chardonnay,  
227 short-read re-sequencing was used to define single nucleotide variation across 15 different  
228 Chardonnay clones. The analysis of these highly related genomes (separated by a low  
229 number of true SNPs) was facilitated through the use of a marker discovery pipeline  
230 developed to call variants while applying a stringent kmer-based filter to remove false  
231 positives (including those calls due to sequencing batch or individual library size distribution  
232 at the expense of some false negative calls). Similar kmer approaches have been reported  
233 with excellent fidelity (33). After filtering, 1620 high confidence marker variants were  
234 identified and evenly distributed across the Chardonnay genome (Table 2, S4 Fig, and  
235 Sheet 1 in S5 Dataset). Variant calls were concatenated and used to generate a  
236 Chardonnay clone phylogeny (Fig 4).

237 ‘CR Red’ and ‘Waite Star’, suspected phenotypic mutants of I10V1 that have red-skinned  
238 and seedless berries respectively (34, 35), formed a tight clade with only 40 variants  
239 (36 SNPs, 4 InDels) separating the three samples. The tight grouping of these clones  
240 confirms that the variant discovery pipeline can reliably detect recent clonal relationships  
241 from independent tissue samples. There were no further *a priori* relationships known for the  
242 remaining clones. However, the variant analysis would suggest that clones 124 and 118 also  
243 share some common ancestry as they are separated by only 23 SNPs.

244 **Table 2: A summary of Chardonnay clonal marker variants**

| Sample Group                                                                    | Number of SNPs and InDels |
|---------------------------------------------------------------------------------|---------------------------|
| Mendoza                                                                         | 221                       |
| 809                                                                             | 187                       |
| 95                                                                              | 150                       |
| G9V7                                                                            | 143                       |
| 277                                                                             | 137                       |
| 76                                                                              | 137                       |
| 548                                                                             | 133                       |
| 352                                                                             | 121                       |
| 1066                                                                            | 120                       |
| 96                                                                              | 61                        |
| CR Red, Waite Star, I10V1                                                       | 60                        |
| 118                                                                             | 27                        |
| Waite Star                                                                      | 26                        |
| 118, 352, 124                                                                   | 24                        |
| CR Red, Waite Star, I10V1, 277                                                  | 18                        |
| CR Red                                                                          | 14                        |
| 352, G9V7                                                                       | 11                        |
| 76, 548                                                                         | 10                        |
| CR Red, Waite Star, I10V1, Mendoza, G9V7, 95, 277, 352, 96, 1066, 124, 118, 809 | 8                         |
| 118, 124, 96                                                                    | 4                         |
| CR Red, Waite Star, I10V1, Mendoza, 809, 95, 277                                | 2                         |
| CR Red, I10V1                                                                   | 2                         |
| 118, 1066, 124, 96                                                              | 2                         |
| 124                                                                             | 2*                        |

245 \*alternate base calls were very low for these two variants.

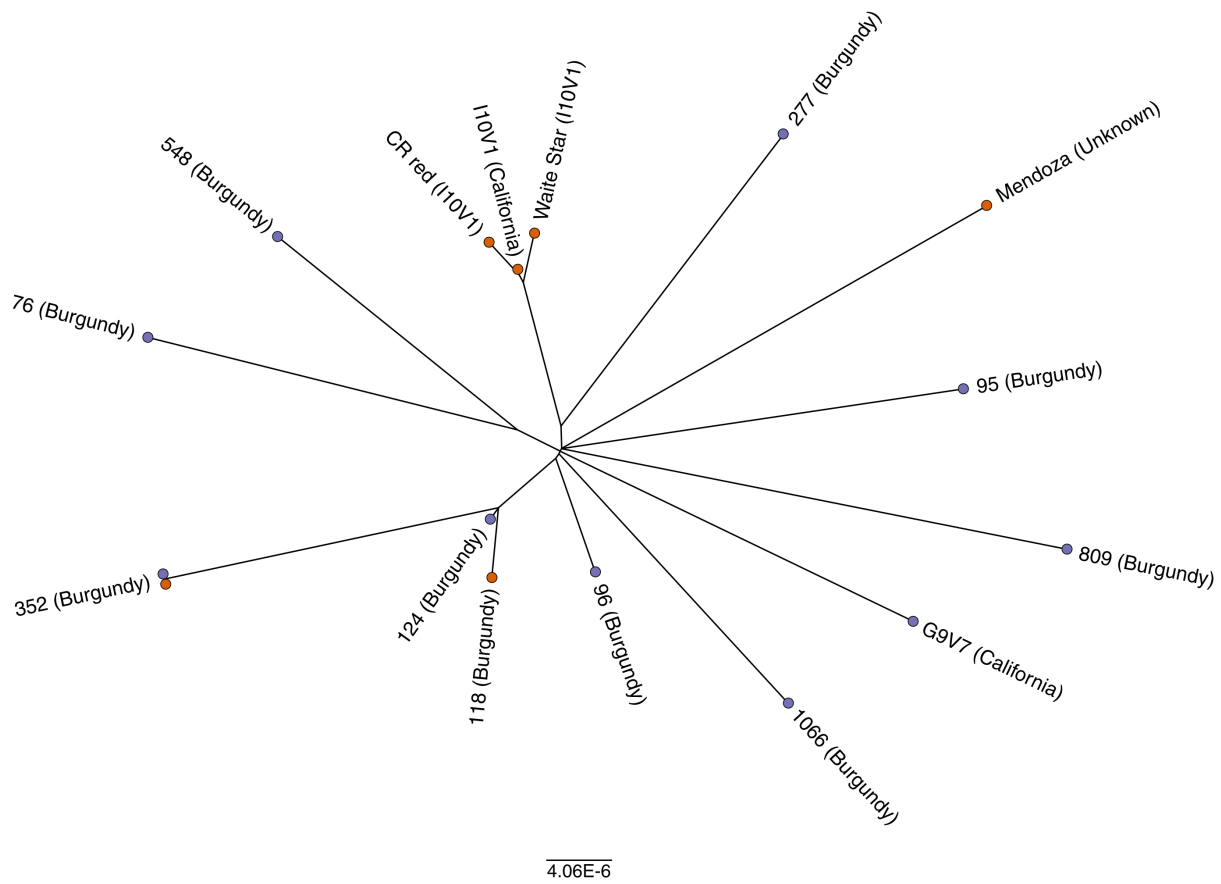

**Fig 4. Genetic diversity in Chardonnay clones.** An unrooted tree of Chardonnay clones based upon bi-allelic SNPs. Sequencing batches are designated by coloured terminal nodes (orange, sequencing batch #1; purple, sequencing batch #2).

The accumulation of SNPs can also lead to phenotypic differentiation that underlies the clonal selection process. For example, the major clonal-specific phenotypic variant of Chardonnay, “Muscat character”, results from one of several single nucleotide substitutions that produce non-synonymous amino acid changes in 1-deoxy-D-xylulose-5-phosphate synthase 1 (*DXS1*) gene and are associated with the production of higher levels of monoterpenoids (36). A combination of Annovar (37) and Provean (Choi *et al.*, 2012) were therefore used to annotate and predict the potential protein-coding consequences of each of the marker variant mutations identified. This pipeline correctly identified a previously characterised Muscat mutation (*S272P*) in *DXS1* in clone 809, the only Chardonnay clone in this study known to display the Muscat character. Provean scored this mutation at  $-3.37$ ,

260 where values less than  $-2.5$  generally signify an increased likelihood that the mutation  
261 impacts the function of the enzyme. In addition to this known Muscat mutation, an additional  
262 55 marker mutations were identified that displayed a high chance of impacted protein  
263 function (Sheet 2 in S5 Dataset). However, further work is required to investigate the links  
264 between known inter-clonal phenotypic variation and these specific mutations.

### 265 **The application of SNP and InDel-based markers for clone-specific genotyping**

266 While various phenotypic characteristics (known as ampelography) and microsatellite based  
267 genetic tests can be used to positively identify grapevines, the accurate identification of  
268 specific clones is extremely difficult and to date, microsatellite-based marker systems have  
269 proven unreliable for the identification of clonal material (38, 39). Uncertainties can therefore  
270 exist as to the exact clone that has been planted in many vineyards. To enable a rapid clonal  
271 re-identification methodology, a kmer-approach was developed (similar to the method  
272 described in Shajii, Yorukoglu (40)) for screening raw short-read sequence data from  
273 unknown Chardonnay samples against the pre-identified clonal-specific variants. This  
274 method queries known marker variants against a kmer count database generated from the  
275 unknown sample. The matching markers and sample groups are returned allowing the  
276 potential identification of the unknown Chardonnay sample.

277 The marker detection pipeline was tested using data from a variety of different samples and  
278 sequencing methods (Sheet 3 in S5 Dataset). Chardonnay clones 76, 124, 548, 809, 1066,  
279 and G9V7 were independently sequenced at a second location from the same genomic DNA  
280 that was used for the original identification of nucleotide variants; however, both a different  
281 library preparation and sequencing platform were used. This enabled an evaluation of  
282 marker suitability and false discovery rates in a best-case scenario (i.e. when the source  
283 DNA was the same). When screened with the pipeline (Fig 5A), between 29% and 76% of  
284 the markers were detected for each of the samples and nearly all the missing markers  
285 coincided with poor coverage at marker loci.



286 To validate suitability of the markers for clonal identification, Chardonnay clones 76, 95, 96,  
287 277, 352, 548 and G9V7 were independently sourced and sequenced. High-coverage  
288 (142- to 244-fold) sequencing was performed for three of these independently-sourced  
289 clones (Fig 5B). Kmer analysis identified between 62% and 81% of the expected markers for  
290 each sample, with minimal (1.2% to 2.6%) off-clone variants detected. However, despite  
291 being the same clones, there were a significant proportion (12% to 36%) of the expected  
292 markers in each of these three samples that were not found in the independent material and  
293 which could not be attributed to insufficient marker loci coverage, which indicates that there  
294 may be intra-clonal genetic variation that has accumulated during the independent  
295 passaging of clonal material.

296 As the level of sequencing coverage ultimately impacts the economics of clonal testing, the  
297 impact of sequencing depth on marker identification was assessed. Data consisting of the  
298 pooled results of two sequencing batches for independently-sourced clone 95 was  
299 subsampled to a range of coverages and then screened for clonal identification effectiveness  
300 (Fig 5C). At 200-fold coverage there were only 2 (low confidence) off-target hits, and none at  
301 lower coverages. There was little difference in the number of discoverable markers from  
302 200-fold down to 25-fold coverage (79% and 73% respectively), and only a 4% decrease in  
303 markers confidently-flagged as missing. At 12-fold coverage it was still possible to detect  
304 58% of the markers for this clone.

305 Given the successful results of the coverage titration, low coverage (9.8- to 24.8-fold) datasets  
306 were obtained from independent material of six clones, with clones 76 and 96 each sourced  
307 from proprietary and generic selections (Fig 5D). Despite the combination of independent  
308 material and low coverage it was still possible to detect between 7% and 38% of the expected  
309 markers for each sample, with no off-target hits.

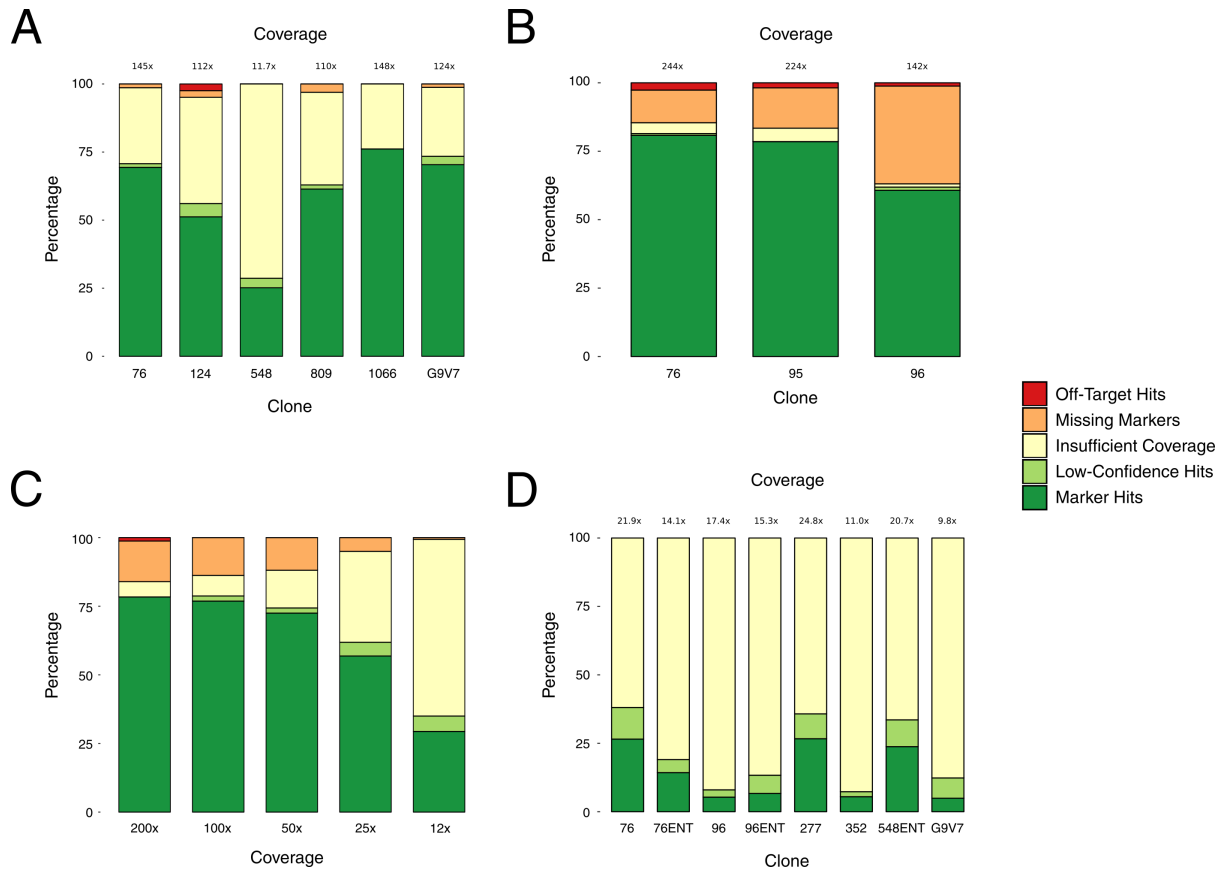

310

311 **Fig 5: Marker screening using WGS data in Chardonnay.** (A) Moderate coverage

312 sequencing of clonal material used in marker discovery. (B) High-coverage sequencing of

313 independently-sourced clonal material. (C) Subsampling of High-Coverage, independently-

314 sourced clonal material (clone 95 from Figure 5B). (D) Low-coverage sequencing of

315 independently-sourced clonal material ('ENT' denotes ENTAV-INRA® source material).

## 316 Discussion

317 The genomic complexity of grapevine, combined with its clonal mode of propagation

318 (absence of outcrossed populations), has so far limited classical genetic approaches to

319 understanding inherited traits in this valuable crop. The availability of a reference genome for

320 *V. vinifera* (14, 15) has facilitated genetic studies through the provision of additional

321 microsatellite markers for parentage and other studies (31, 41-43) and more recently has

322 driven the development of dense SNP arrays that are being used for analysis of population

323 structure and genome wide association studies (44-46). While not subject to the same

324 technical limitations of microsatellite analysis (47), using predefined sets of SNPs also has  
325 its limitations, particularly with regard to discovery of novel genomic features. Recent  
326 advances in sequencing technology, and specifically read length, have provided a way  
327 forward, enabling repeat-rich genomes, such as grapevine, to be considered in their native  
328 state, without having to strip its inherent genomic variability in order to achieve a genome  
329 model with moderate contiguity.

330 A reference genome for Chardonnay was produced using long-read single-molecule  
331 sequence data in order to more precisely and accurately define the differences between the  
332 almost identical derivatives (clones) of a single cultivar. The Chardonnay assembly reported  
333 here exhibits a high level of contiguity and predicted completeness and provides a  
334 fundamental platform for the in-depth investigation of Chardonnay's genome function and,  
335 more generally, of grapevine evolution and breeding.

336 Heterosis has been reported to have played a large role in the prominence of Gouais blanc  
337 and Pinot noir crosses in wine grapevines (5). Deleterious mutations in inbred lines can lead  
338 to increased susceptibility to pests and diseases, reduced stress tolerance, and poorer  
339 biomass production (5). This can be offset with the introduction of novel genes and gene  
340 families by crossing with a genetically dissimilar sample. The inheritance of an expanded  
341 family of *FAR2-like* genes from Gouais blanc represents one example of where this may  
342 have occurred in Chardonnay. The sequence divergence in *FAR2-like* copies and  
343 haplotypes suggests that the gene expansion event was not a recent occurrence. The  
344 increased gene copy number and sequence diversity potentially enriches the Chardonnay  
345 genome for both redundancy and functionality of this gene.

346 Fatty Acyl-CoA Reductase (FAR) enzymes catalyse the reaction: long-chain acyl-CoA + 2  
347 NADPH  $\rightarrow$  CoA + a long-chain alcohol + 2 NADP<sup>+</sup> (48, 49). There are numerous copies of  
348 FARs in plants and each tends to be specific for long-chain acyl-CoA molecules of a certain

349 length (50). FARs form the first step in wax biosynthesis and are associated with many plant  
350 surfaces, most notably epicuticular wax. Epicuticular waxes are important for protecting  
351 plants against physical damage, pathogens, and water loss (51-55). It was reported in  
352 Konlechner and Sauer (56) that Chardonnay has a very high production and unique pattern  
353 of epicuticular wax; this might be attributed to novel FARs. The fatty alcohols produced by  
354 *FAR2* are associated with production of sporopollenin, which forms part of the protective  
355 barrier for pollen (57). More work is needed to determine if the expanded family of *FAR2-like*  
356 genes identified here influences fertility or epicuticular wax levels in Chardonnay.

357 The Chardonnay genome enables thorough characterization of inter-clonal genetic variation.  
358 Attempts have been made in the past to use whole genome shotgun sequencing (WGS) to  
359 characterize inter-clonal diversity in other grapevine cultivars. These were ultimately limited  
360 by either available sequencing technology (58) or a lack of a reference genome for the  
361 particular grapevine variety under investigation (58, 59), although both studies were able to  
362 identify a small number of inter-clonal nucleotide variants. By taking advantage of both a  
363 reference genome for Chardonnay and increased read coverage, this study was able to  
364 identify 1620 high quality inter-clone nucleotide variants. There were limited shared somatic  
365 mutations among the Chardonnay clones, especially outside of the highly-related I10V1  
366 group (I10V1, CR-Red and Waite Star). Clones 118 and 124, varieties from Burgundy used  
367 predominantly for sparkling wine production, were the exceptions to this, with 56% of their  
368 mutations being common between the two clones. Otherwise, the Chardonnay clones do not  
369 share a significant number of common mutations. This is likely the result of the centuries-  
370 long history of mass selection propagation. The clonal varieties of today likely represent a  
371 very small fraction of the genetic diversity that existed for Chardonnay after generations of  
372 serial propagation. The end result of this is that the many clones that were isolated from  
373 mass-selected vineyards appear to be genetically quite distinct from one another.

374 Furthermore, as the marker discovery pipeline developed in this study was limited in scope  
375 to detecting nucleotide polymorphisms within non-repetitive areas of the genome, there are  
376 likely to be structural variants, such as transposon insertions, that also impact on clonal-  
377 specific phenotypes. Nevertheless, marker mutations were identified for most of the clones  
378 that are predicted to impact gene function and could account for some of the clone specific  
379 phenotypes in Chardonnay.

380 Inter-clonal genetic variation provides an avenue for testing clone authenticity. The clone  
381 detection pipeline provides a fast and simple method to detect defined markers from a range  
382 of WGS library chemistries and platforms. Markers were reliably detected at coverages as  
383 low as 9.8-fold. Validation using independently-sourced clonal material indicated that most of  
384 the genetic variants were likely suitable for use in the identification of clones. Furthermore,  
385 there were a significant portion of markers that appeared to be variable across  
386 independently-sourced clonal material. This suggests that there might be region-specific  
387 genetic variation between clonal populations and this could potentially be exploited to further  
388 pinpoint the source of Chardonnay clones to specific regions, or to split clones into divergent  
389 subsets. The marker discovery and marker detection pipelines together form a solid  
390 framework for the future use of SNP- and InDel-based markers for the identification of  
391 unknown vegetatively propagated plant clones.

392 While the diploid Chardonnay reference genome enabled a much deeper understanding of  
393 the variation that has occurred since the initial establishment of this variety, it has also  
394 provided the means to unravel the detailed genetic ancestry of this variety and its parents,  
395 Pinot noir and Gouais blanc. Chardonnay matches both haplotypes of Pinot noir across  
396 approximately one fifth of its genome and these areas include large tracks of both  
397 homozygous and heterozygous variation. While the presence of the homozygous 'double-  
398 Pinot noir' regions could be result of a high number of large-scale gene conversion events  
399 early in Chardonnay's history, the numerous heterozygous double-Pinot noir regions are

400 only possible if the haplotype inherited from Gouais blanc was almost identical to the non-  
401 inherited allele of Pinot noir. Gouais blanc sequencing indeed confirms that within these  
402 'double-Pinot noir' regions, one of the two Pinot noir haplotypes is a match for an allele of  
403 Gouais blanc.

404 The data reported in this work therefore supports a more complicated pedigree for  
405 Chardonnay than simply a sexual cross between two distantly related parents (Fig 6). The  
406 two parents of Chardonnay are predicted to share a large proportion of their genomes; this is  
407 suggestive of a previous cross between Pinot noir and a very recent ancestor of Gouais  
408 blanc (Pinot noir might even be a direct parent of Gouais blanc). Surprisingly, data  
409 supporting this complicated relationship between Gouais blanc and Pinot noir have  
410 appeared in previous low-resolution DNA marker analyses, with the two varieties sharing  
411 marker alleles at over 60% of marker loci in two separate studies (1, 31). However, the  
412 potential kinship between the two ancient varieties could not have been discovered without  
413 the insights provided by this diploid-phased Chardonnay genome.

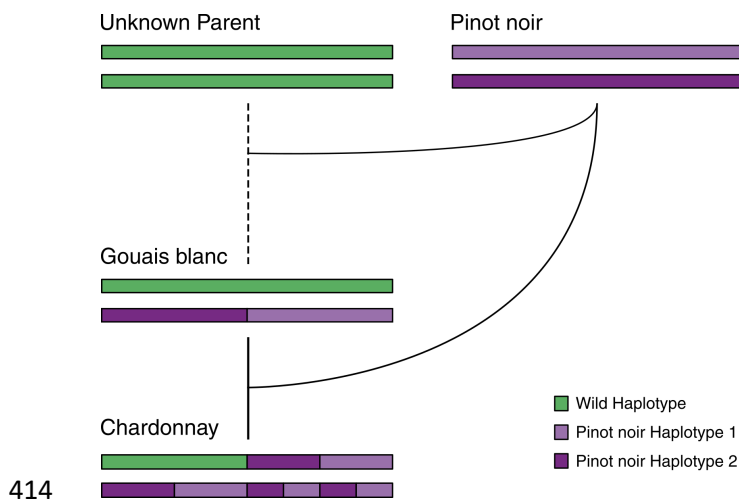

414

415 **Fig 6: A schematic model for the complex pedigree of Chardonnay, Gouais blanc and**  
416 **Pinot noir.** Two crossing events (akin to a standard genetic backcross) with Pinot noir would  
417 result in the homozygous and heterozygous Pinot noir regions present in Chardonnay.

418 A high-quality, diploid-phased Chardonnay assembly provided the means to assess several  
419 interesting facets of grapevine biology. It was possible to detect instances of heterosis, with  
420 differentially-expanded gene families being inherited from the parents of Chardonnay and to  
421 define the nucleotide variation that has accumulated during asexual propagation of this  
422 woody-plant species. However, most surprisingly, the completed genome indicates that the  
423 parents of Chardonnay shared a high degree of kinship, suggesting that the pedigree of this  
424 important wine-grape variety might be more complicated than originally thought.

## 425 **Methods**

426 All custom scripts used for analysis, along with detailed workflows are available in  
427 S6 Archive. All sequencing data and the genome assembly have been lodged at the  
428 National Center for Biotechnology Information under the BioProject accession:  
429 PRJNA399599.

## 430 **DNA preparation and sequencing**

431 Nuclear DNA was isolated from early season, disease free, field grown Chardonnay leaves  
432 taken from plants at a nursery vineyard (Oxford Landing, Waikerie, South Australia). DNA  
433 was extracted by Bio S&T (Quebec, Canada) from nuclear-enriched material using a  
434 CTAB/Chloroform method. DNA from clone I10V1 was enriched using a 1:0.45 Ampure  
435 cleanup prior to being used to build 15-50 kb SMRT Bell libraries with Blue Pippin size  
436 selection following library preparation (Ramaciotti Centre for Genomics, UNSW, Sydney,  
437 Australia). These libraries were sequenced on a PacBio RSII using 54 SMRT cells to give a  
438 total sequencing yield of 51,921 Mb (115-fold coverage) with an N50 length of 14.4 kb.  
439 Short-read sequencing of clones for marker discovery was performed on Illumina HiSeq  
440 2000 and HiSeq X-Ten platforms from TruSeq libraries (100 and 150 bp paired end read  
441 chemistries). Short-read sequencing of clones for marker validation was performed on  
442 Illumina HiSeq 2500 and MiSeq platforms from Nextera libraries made from material sourced

443 from both Foundation Plant Services (University of California, Davis) and Mission Hill Family  
444 Estate, Quail's Gate and Burrowing Owl wineries in British Columbia, Canada.

#### 445 **Assembly**

446 The FASTA subreads were used to assemble the genome using FALCON  
447 (commit: 103ca89). Length cut-offs of 18 000 bp and 9 000 bp were used for the subread  
448 error correction and error-corrected reads respectively. FALCON Unzip (commit: bfa5e6e)  
449 was used with default parameters to phase the assembly from the FASTA subreads and  
450 Quiver-polish from the raw sequencing data.

451 The Purge Haplotigs pipeline (commit: f63c180)(29) was developed to automate the  
452 identification and reassignment of syntenic contigs from highly heterozygous long-read  
453 based assemblies. The PacBio RS II subreads were mapped to the diploid assembly  
454 (primary contig and haplotigs) using BLASR (packaged with SMRT-Link v3.1.0.180439)(60)  
455 and sorted with SAMtools v1.3.1. As required by Purge Haplotigs, read-depth thresholds  
456 were chosen to capture both peaks (diploid and haploid coverage levels) from the bimodal  
457 read-depth histogram and a contig-by-contig breakdown of average read-depth was  
458 calculated. Purge Haplotigs takes the read-depth summary and uses sequence alignments  
459 to reassign contigs. Curated primary contigs were assigned to *V. vinifera* chromosomes by  
460 using the PN40024 Pinot noir reference genome for scaffolding and for the identification of  
461 possible mis-assemblies. Several mis-assemblies were identified and manually corrected.  
462 The haploid and diploid curated assemblies were evaluated with BUSCO v3.0.1 using the  
463 embryophyta ODB v9 database.

#### 464 **Annotation**

465 A custom repeat library was produced for Chardonnay for use with RepeatMasker, similar to  
466 the method described in Fallon, Lower (61). Miniature inverted-repeat transposable element  
467 (MITE) sequences for *V. vinifera* were obtained from the P-MITE database (62). Repeats



468 were predicted using RepeatModeler open-1.0.10 (63), and the RepeatModeler predictions  
469 and MITE sequences were concatenated to produce the custom Chardonnay repeat library.  
470 Repeats were annotated using RepeatMasker open-4.0.7 using this custom library.

471 RNA-seq was performed on total RNA extracted from I10V1 leaf tissue, extracted using a  
472 Spectrum Plant Total RNA Kit (Sigma), and sequenced using Illumina paired-end 75 bp  
473 chemistry on the Hiseq 2500 platform (Michael Smith Genome Sciences Centre, British  
474 Columbia Cancer Research Centre, British Columbia). Additional RNA-seq data from  
475 Chardonnay berry skins were obtained from the Sequence Read Archive (BioProject:  
476 PRJNA260535). All RNA-seq reads were mapped to the Chardonnay genome using  
477 STAR v2.5.2b (64), with transcripts predicted using Cufflinks v2.2.1 (65). Initial transcript  
478 predictions and repeat annotations were then used in the Maker gene prediction pipeline  
479 (v2.31.9) using Augustus v3.2.3 (66). The predicted proteins were assigned OrthoMCL (67)  
480 and KEGG annotations (68) for orthology and pathway prediction. Draft names for the  
481 predicted proteins were obtained from protein BLAST v2.2.31+ (69) hits against the Uniprot  
482 knowledgebase (70, 71) using an evaluate cutoff of  $1e-10$ .

### 483 **Parental mapping**

484 Using BLAST and MUMmer v4.0.0beta (72) alignments, the primary contigs were aligned to  
485 the PN40024 reference, and the haplotigs were aligned to the primary contigs. The  
486 alignment coordinates were used to trim and extract the closely aligning phase-blocks  
487 between the primary contigs and haplotigs. BED files were produced that could be used for  
488 mapping the phase-blocks to the primary contigs and the chromosome-ordered scaffolds.

489 To identify the most likely parent for each phase-block pair, publicly-available short-read  
490 sequencing data were obtained for three clonally-derived variants of Pinot noir; Pinot blanc,  
491 Pinot gris, and Pinot meunier (BioProject: PRJNA321480); data for Pinot noir were not  
492 available at the time of analysis. To avoid potential issues with data from any single Pinot

493 variety, pooled reads from all three were used for mapping. The sequencing data for Pinot,  
494 Chardonnay, and Gouais blanc were mapped to the primary contig and haplotig phase-block  
495 sequences using BWA-MEM v0.7.12 (73). PCR duplicates and discordantly-mapped reads  
496 were removed, and poorly mapping regions were masked using a window coverage  
497 approach. Heterozygous SNPs were called using VarScanv2.3 (p-value < 1e-6, coverage >  
498 10, alt reads > 30%)(74) and Identity By State (IBS) was assessed over 10 kb windows (5 kb  
499 steps) at every position where a heterozygous Chardonnay SNP was found.

500 Where the parent (Pinot or Gouais blanc) was homozygous and matched the reference  
501 base, an IBS of 2 was called. Where the parent was homozygous and did *not* match the  
502 reference base, an IBS of 0 was called. Finally, where the parent and Chardonnay had  
503 identical heterozygous genotype, an IBS of 1 was called. The spread of IBS calls was used  
504 to assign windows as 'Pinot', 'Gouais blanc', or 'double-match'. The window coordinates  
505 were transformed to chromosome-ordered scaffold coordinates and neighbouring identically  
506 called windows were chained together. Complementary Pinot/Gouais blanc calls from the  
507 parent datasets were merged and clashing calls removed. For ease of visualisation, the  
508 'double-match' calls from the Pinot dataset were merged with the Gouais blanc calls (and  
509 vice versa). A SNP density track for the Chardonnay primary contigs was created over 5-kb  
510 windows from previously-mapped Illumina reads. The chromosome ideograms with SNP  
511 densities and IBS assignments were produced in Rstudio using ggplot2.

512 An orthologous kmer method for assigning parentage was developed to assign parentage  
513 over the entire genome. All 27-bp-long kmers (27mers) were counted using  
514 JELLYFISH v2.2.6 (canonical representation, singletons ignored)(75) directly from Pinot,  
515 Gouais blanc, and Chardonnay I10V1 PE reads to create 27mer count databases. Non-  
516 overlapping 1-kb windows were generated for the primary contigs and the haplotigs. For  
517 each window all 27mers were extracted from the contig sequences, queried against the  
518 kmer count databases using JELLYFISH and the number of kmers not appearing in each

519 were returned. The Pinot/Gouais blanc missing kmer counts were normalised against the  
520 Chardonnay counts and averaged over 10 kb windows with 5-kb steps. Windows with 150 or  
521 more missing kmers were classified as mismatch (missing kmer density was visualized over  
522 the genome to determine an appropriate cut-off) and neighbouring complementary windows  
523 were merged.

## 524 **Gene expansion**

525 Protein-based BLAST alignments of Chardonnay proteins were performed against the Pinot  
526 noir (PN40024) reference proteome. Chardonnay Maker GFF annotations and PN40024  
527 GFF annotations were converted to BED format. Chardonnay annotations were then  
528 transformed to scaffold coordinates. The 'blast\_to\_raw.py' script (from  
529 [github.com/tanghaibao/quota-alignment](https://github.com/tanghaibao/quota-alignment)) was used to flag tandem repeat homologues for  
530 both the primary contig and haplotig Chardonnay proteins against the Pinot noir reference.  
531 Illumina paired-end reads for Pinot were mapped to the Chardonnay primary and haplotig  
532 assemblies, BED annotations were created for regions with poor mapping, and these  
533 annotations were transformed to the scaffold coordinates for use with filtering. Predicted  
534 expanded gene families in Chardonnay that resided in Gouais blanc regions (identified using  
535 the kmer parental mapping) that had multiple gene models with poor read-coverage of Pinot  
536 mapped reads were returned as a filtered list. Dotplots were produced with MUMmer and the  
537 chromosomes were visually assessed for evidence of tandem sequence duplication at the  
538 filtered gene expansion candidate loci. The genomic sequences of *FAR2-like* ORFs from the  
539 Pinot noir assembly and from the Chardonnay primary contigs and haplotigs were aligned  
540 using MUSCLE v3.8.31 (76) within AliView v1.20 (77). Phylogenies were calculated within  
541 Rstudio using Ape (78) and Phangorn (79).

## 542 **Marker variant discovery**

543 Paired-end reads for each clone were manually quality trimmed using Trimmomatic v0.36  
544 (SLIDINGWINDOW:5:20, TRAILING:20, CROP:100)(80), mapped to the Chardonnay

545 reference genome using BWA-MEM and filtered for concordant and non-duplicated reads.  
546 Variant calls were made using VarScan (p-value < 1e-3, alt reads > 15%) with variants  
547 across each clone pooled into a combined set. The combined variant set was then  
548 compared against leniently-scored variant calls for each clone (alt reads > 5, alt reads >  
549 5%), with differences in genotype between clones resulting in that variant being flagged as a  
550 potential clonal marker.

551 Kmers were used to filter false positives from the pool of potential clonal markers. Kmer  
552 count databases (27mers) were created for each clone from the sequencing reads using  
553 JELLYFISH. For each potential marker, all possible kmers at the marker loci, from all  
554 samples, were extracted from the sequencing reads in the BAM alignment files. The kmer  
555 counts were queried from the kmer databases for each sample. Where a set of unique  
556 kmers were present for the matching samples, that variant was confirmed as a marker. The  
557 marker variants, marker kmers, and shared kmers were output in a table for use with  
558 querying unknown Chardonnay clones.

### 559 **Marker detection pipeline**

560 Markers are detected directly from short-read sequencing data using kmers. A kmer count  
561 database (27mers) is calculated from raw sequencing reads as previously-described. The  
562 marker kmers and shared kmers that were identified in the marker discovery pipeline are  
563 then queried from the kmer database. A marker is flagged as a 'hit' if >80% of the marker  
564 kmers are present (at a depth of at least 3), and as 'low-confidence hit' if 30–80% of the  
565 marker kmers are present. Markers are flagged as 'insufficient read coverage' if fewer than  
566 80% of the shared kmers are present at a depth of at least 12.

### 567 **Data Availability Statement**

568 Raw sequencing reads, and the Chardonnay assembly and annotations are available under  
569 the BioProject accession PRJNA399599 at the National Center for Biotechnology

570 Information. All custom code and analysis workflows required to reproduce the results  
571 presented are included in S6 Archive. Intermediate files can be made available on request.

## 572 **Acknowledgements**

573 We thank Nick Dry (Yalumba Nursery) and Michael McCarthy (South Australian Research  
574 and Development Institute) for provision of plant material; Andrew Lonie and Torsten  
575 Seemann (University of Melbourne), Cihan Altinay and Derek Benson (University of  
576 Queensland), Stephen Crawley (QCIF), QRIScloud, and Melbourne Bioinformatics for  
577 assistance with computing resources; Jason Chin, Gregory Concepcion and Emily Hatas  
578 (Pacific Biosciences) for early access and guidance on FALCON Unzip; Sean Myles who  
579 acted as an advisor to Genome BC and Samantha Turner for outstanding administrative  
580 duties.

581 This project is supported by Australia's grapegrowers and winemakers through their  
582 investment body Wine Australia, with matching funds from the Australian Government.  
583 Grapevine genomics work at the AWRI is also supported by Bioplatforms Australia as part of  
584 the National Collaborative Research Infrastructure Strategy, an initiative of the Australian  
585 Government. Funding was also obtained from Genome British Columbia and the Wine  
586 Research Centre at The University of British Columbia.

## 587 **Authors' contributions**

588 SAS, ARB, DLJ, HJJVV, SJJ, JB and ISP conceived and outlined the original approaches for  
589 the project. SAS sourced clonal material for reference sequencing and marker discovery.  
590 HJJVV, SJJ and JB provided material and sequence data for clonal validation. MJR, SAS  
591 and ARB designed and implemented the approaches used for genome assembly, marker  
592 discovery, and genome analysis. MJR, SAS and ARB wrote the manuscript, which was  
593 reviewed by all authors.

## 594 **References**

- 595 1. Bowers J, Boursiquot J-M, This P, Chu K, Johansson H, Meredith C. Historical  
596 Genetics: The Parentage of Chardonnay, Gamay, and Other Wine Grapes of Northeastern  
597 France. *Science*. 1999;285(5433):1562-5.
- 598 2. Hunt HV, Lawes MC, Bower MA, Haeger JW, Howe CJ. A banned variety was the  
599 mother of several major wine grapes. *Biology Letters*. 2010;6(3):367-9.
- 600 3. Anderson K, Aryal NR. Database of Regional, National and Global Winegrape  
601 Bearing Areas by Variety, 2000 and 2010, Wine Economics Research Centre, University of  
602 Adelaide (third revision July 2014). 2013.
- 603 4. Bernard R. Aspects of clonal selection in Burgundy. *Proceedings of the International*  
604 *Symposium on Clonal Selection*. 1995:17-9.
- 605 5. Olmo HP. Selecting and breeding new grape varieties. *California Agriculture*.  
606 1980;34(7):23-4.
- 607 6. Bettiga LJ. Comparison of Seven Chardonnay Clonal Selections in the Salinas  
608 Valley. *American Journal of Enology and Viticulture*. 2003;54(3):203-6.
- 609 7. Reynolds AG, Cliff M, Wardle DA, King M. Evaluation of Winegrapes in British  
610 Columbia: 'Chardonnay' and 'Pinot noir' Clones. *HortTechnology*. 2004;14(4):594-602.
- 611 8. Fidelibus MW, Christensen LP, Katayama DG, Verdenal P-T. Yield Components and  
612 Fruit Composition of Six Chardonnay Grapevine Clones in the Central San Joaquin Valley,  
613 California. *American Journal of Enology and Viticulture*. 2006;57(4):503-7.
- 614 9. Vouillamoz JF, Grando MS. Genealogy of wine grape cultivars: 'Pinot' is related to  
615 'Syrah'. *Heredity*. 2006;97:102-10.
- 616 10. Anderson MM, Smith RJ, Williams MA, Wolpert JA. Viticultural Evaluation of French  
617 and California Chardonnay Clones Grown for Production of Sparkling Wine. *American*  
618 *Journal of Enology and Viticulture*. 2008;59(1):73-7.

- 619 11. Duchêne E, Legras JL, Karst F, Merdinoglu D, Claudel P, Jaegli N, et al. Variation of  
620 linalool and geraniol content within two pairs of aromatic and non-aromatic grapevine clones.  
621 Australian Journal of Grape and Wine Research. 2009;15(2):120-30.
- 622 12. Nicholas PP. National register of grapevine varieties and clones. 2006 ed ed:  
623 Australian Vine Improvement Association; 2006.
- 624 13. Wolpert JA, Kasimatis AN, Weber E. Field Performance of Six Chardonnay Clones in  
625 the Napa Valley. American Journal of Enology and Viticulture. 1994;45(4):393-400.
- 626 14. Jaillon O, Aury JM, Noel B, Policriti A, Clepet C, Casagrande A, et al. The grapevine  
627 genome sequence suggests ancestral hexaploidization in major angiosperm phyla. Nature.  
628 2007;449(7161):463-7.
- 629 15. Velasco R, Zharkikh A, Troggio M, Cartwright DA, Cestaro A, Pruss D, et al. A High  
630 Quality Draft Consensus Sequence of the Genome of a Heterozygous Grapevine Variety.  
631 PLoS ONE. 2007;2(12):e1326.
- 632 16. Minio A, Lin J, Gaut BS, Cantu D. How Single Molecule Real-Time Sequencing and  
633 Haplotype Phasing Have Enabled Reference-Grade Diploid Genome Assembly of Wine  
634 Grapes. Frontiers in Plant Science. 2017;8(826).
- 635 17. Eid J, Fehr A, Gray J, Luong K, Lyle J, Otto G, et al. Real-time DNA sequencing from  
636 single polymerase molecules. Science. 2009;323(5910):133-8.
- 637 18. Lu H, Giordano F, Ning Z. Oxford Nanopore MinION Sequencing and Genome  
638 Assembly. Genomics, proteomics & bioinformatics. 2016;14(5):265-79.
- 639 19. Chin C-S, Peluso P, Sedlazeck FJ, Nattestad M, Concepcion GT, Clum A, et al.  
640 Phased diploid genome assembly with single-molecule real-time sequencing. Nature  
641 Methods. 2016;13:1050-4.
- 642 20. Koren S, Walenz BP, Berlin K, Miller JR, Bergman NH, Phillippy AM. Canu: scalable  
643 and accurate long-read assembly via adaptive k-mer weighting and repeat separation.  
644 Genome Research. 2017;27(5):722-36.

- 645 21. Fu X, Li J, Tian Y, Quan W, Zhang S, Liu Q, et al. Long-read sequence assembly of  
646 the firefly *Pyrocoelia pectoralis* genome. *GigaScience*. 2017;6(12):1-7.
- 647 22. Khost DE, Eickbush DG, Larracuenta AM. Single-molecule sequencing resolves the  
648 detailed structure of complex satellite DNA loci in *Drosophila melanogaster*. *Genome*  
649 *Research*. 2017;27(5):709-21.
- 650 23. Yoshida Y, Koutsovoulos G, Laetsch DR, Stevens L, Kumar S, Horikawa DD, et al.  
651 Comparative genomics of the tardigrades *Hypsibius dujardini* and *Ramazzottius*  
652 *varieornatus*. *PLOS Biology*. 2017;15(7):e2002266.
- 653 24. Jain M, Koren S, Miga KH, Quick J, Rand AC, Sasani TA, et al. Nanopore  
654 sequencing and assembly of a human genome with ultra-long reads. *Nature Biotechnology*.  
655 2018;36:338–45
- 656 25. Chin C-S, Alexander DH, Marks P, Klammer AA, Drake J, Heiner C, et al. Nonhybrid,  
657 finished microbial genome assemblies from long-read SMRT sequencing data. *Nature*  
658 *Methods*. 2013;10:563-9.
- 659 26. Simão FA, Waterhouse RM, Ioannidis P, Kriventseva EV, Zdobnov EM. BUSCO:  
660 assessing genome assembly and annotation completeness with single-copy orthologs.  
661 *Bioinformatics*. 2015;31(19):3210-2.
- 662 27. Vinson JP, Jaffe DB, O'Neill K, Karlsson EK, Stange-Thomann N, Anderson S, et al.  
663 Assembly of polymorphic genomes: algorithms and application to *Ciona savignyi*. *Genome*  
664 *Research*. 2005;15(8):1127-35.
- 665 28. Kajitani R, Toshimoto K, Noguchi H, Toyoda A, Ogura Y, Okuno M, et al. Efficient de  
666 novo assembly of highly heterozygous genomes from whole-genome shotgun short reads.  
667 *Genome Research*. 2014;24(8):1384-95.
- 668 29. Roach MJ, Schmidt SA, Borneman AR. Purge Haplotigs: Synteny Reduction for  
669 Third-gen Diploid Genome Assemblies. *bioRxiv*. 2018:286252.



- 670 30. Cantarel BL, Korf I, Robb SMC, Parra G, Ross E, Moore B, et al. MAKER: An easy-  
671 to-use annotation pipeline designed for emerging model organism genomes. *Genome*  
672 *Research*. 2008;18(1):188-96.
- 673 31. Lacombe T, Boursiquot J-M, Laucou V, Di Vecchi-Staraz M, Péros J-P, This P.  
674 Large-scale parentage analysis in an extended set of grapevine cultivars (*Vitis vinifera* L.).  
675 *Theoretical and Applied Genetics*. 2013;126(2):401-14.
- 676 32. Marroni F, Scaglione D, Pinosio S, Policriti A, Miculan M, Di Gaspero G, et al.  
677 Reduction of heterozygosity (ROH) as a method to detect mosaic structural variation. *Plant*  
678 *Biotechnology Journal*. 2017;15(7):791-3.
- 679 33. Gómez-Romero L, Palacios-Flores K, Reyes J, García D, Boege M, Dávila G, et al.  
680 Precise detection of de novo single nucleotide variants in human genomes. *Proceedings of*  
681 *the National Academy of Sciences*. 2018.
- 682 34. Boss PK, Davies C, Robinson S P. Anthocyanin composition and anthocyanin  
683 pathway gene expression in grapevine sports differing in berry skin colour. *Australian*  
684 *Journal of Grape and Wine Research*. 1996;2(3):163-70.
- 685 35. Longbottom ML, Dry PR, Sedgley M. Observations on the morphology and  
686 development of star flowers of *Vitis vinifera* L. cvs Chardonnay and Shiraz. *Australian*  
687 *Journal of Grape and Wine Research*. 2008;14(3):203-10.
- 688 36. Emanuelli F, Battilana J, Costantini L, Le Cunff L, Boursiquot JM, This P, et al. A  
689 candidate gene association study on muscat flavor in grapevine (*Vitis vinifera* L.). *BMC plant*  
690 *biology*. 2010;10:241.
- 691 37. Wang K, Li M, Hakonarson H. ANNOVAR: functional annotation of genetic variants  
692 from high-throughput sequencing data. *Nucleic Acids Research*. 2010;38(16):e164-e.
- 693 38. Cipriani G, Marrazzo MT, Di Gaspero G, Pfeiffer A, Morgante M, Testolin R. A set of  
694 microsatellite markers with long core repeat optimized for grape (*Vitis* spp.) genotyping. *BMC*  
695 *plant biology*. 2008;8(1):127.

- 696 39. Laucou V, Lacombe T, Dechesne F, Siret R, Bruno JP, Dessup M, et al. High  
697 throughput analysis of grape genetic diversity as a tool for germplasm collection  
698 management. *Theoretical and Applied Genetics*. 2011;122(6):1233-45.
- 699 40. Shajii A, Yorukoglu D, William Yu Y, Berger B. Fast genotyping of known SNPs  
700 through approximate k-mer matching. *Bioinformatics*. 2016;32(17):i538-i44.
- 701 41. Cipriani G, Spadotto A, Jurman I, Di Gaspero G, Crespan M, Meneghetti S, et al. The  
702 SSR-based molecular profile of 1005 grapevine (*Vitis vinifera* L.) accessions uncovers new  
703 synonymy and parentages, and reveals a large admixture amongst varieties of different  
704 geographic origin. *Theoretical and Applied Genetics*. 2010;121(8):1569-85.
- 705 42. Lorenzis Gd, Imazio S, Brancadoro L, Failla O, Scienza A. Evidence for a Sympatric  
706 Origin of Ribolla gialla, Gouais Blanc and Schiava cultivars (*V. vinifera* L.). *South African  
707 Journal of Enology and Viticulture*. 2014;35(1):149-56.
- 708 43. Maul E, Eibach R, Zyprian E, Töpfer R. The prolific grape variety (*Vitis vinifera* L.)  
709 'Heunisch Weiss' (= 'Gouais blanc'): bud mutants, "colored" homonyms and further offspring.  
710 *Journal of Grapevine Research*. 2015;54(2):79-86.
- 711 44. Lijavetzky D, Cabezas JA, Ibanez A, Rodriguez V, Martinez-Zapater JM. High  
712 throughput SNP discovery and genotyping in grapevine (*Vitis vinifera* L.) by combining a re-  
713 sequencing approach and SNPlex technology. *BMC Genomics*. 2007;8:424.
- 714 45. Myles S, Chia JM, Hurwitz B, Simon C, Zhong GY, Buckler E, et al. Rapid genomic  
715 characterization of the genus vitis. *PLoS One*. 2010;5(1):e8219.
- 716 46. Laucou V, Launay A, Bacilieri R, Lacombe T, Adam-Blondon AF, Berard A, et al.  
717 Extended diversity analysis of cultivated grapevine *Vitis vinifera* with 10K genome-wide  
718 SNPs. *PLoS One*. 2018;13(2):e0192540.
- 719 47. This P, Jung A, Boccacci P, Borrego J, Botta R, Costantini L, et al. Development of a  
720 standard set of microsatellite reference alleles for identification of grape cultivars. *Theoretical  
721 and Applied Genetics*. 2004;109(7):1448-58.

- 722 48. Kunst L, Samuels AL. Biosynthesis and secretion of plant cuticular wax. Progress in  
723 Lipid Research. 2003;42(1):51-80.
- 724 49. Cheng JB, Russell DW. Mammalian wax biosynthesis. I. Identification of two fatty  
725 acyl-Coenzyme A reductases with different substrate specificities and tissue distributions.  
726 Journal of biological Chemistry. 2004;279(36):37789-97.
- 727 50. Rowland O, Domergue F. Plant fatty acyl reductases: Enzymes generating fatty  
728 alcohols for protective layers with potential for industrial applications. Plant Science.  
729 2012;193-194:28-38.
- 730 51. Krauss P, MarkstÄDter C, Riederer M. Attenuation of UV radiation by plant cuticles  
731 from woody species. Plant, Cell & Environment. 2005;20(8):1079-85.
- 732 52. Leide J, Hildebrandt U, Reussing K, Riederer M, Vogg G. The Developmental Pattern  
733 of Tomato Fruit Wax Accumulation and Its Impact on Cuticular Transpiration Barrier  
734 Properties: Effects of a Deficiency in a  $\beta$ -Ketoacyl-Coenzyme A Synthase (LeCER6). Plant  
735 physiology. 2007;144(3):1667-79.
- 736 53. Isaacson T, Kosma DK, Matas AJ, Buda GJ, He Y, Yu B, et al. Cutin deficiency in the  
737 tomato fruit cuticle consistently affects resistance to microbial infection and biomechanical  
738 properties, but not transpirational water loss. the Plant Journal. 2009;60(2):363-77.
- 739 54. Yeats TH, Rose JKC. The Formation and Function of Plant Cuticles. Plant  
740 physiology. 2013;163(1):5-20.
- 741 55. Xue D, Zhang X, Lu X, Chen G, Chen Z-H. Molecular and Evolutionary Mechanisms  
742 of Cuticular Wax for Plant Drought Tolerance. Frontiers in Plant Science. 2017;8:621.
- 743 56. Konlechner C, Sauer U. Ultrastructural leaf features of grapevine cultivars (*Vitis*  
744 *vinifera* L. ssp. *vinifera*). OENO One. 2016;50(4).
- 745 57. Dobritsa AA, Shrestha J, Morant M, Pinot F, Matsuno M, Swanson R, et al.  
746 CYP704B1 is a long-chain fatty acid omega-hydroxylase essential for sporopollenin  
747 synthesis in pollen of Arabidopsis. Plant physiology. 2009;151(2):574-89.

- 748 58. Carrier G, Le Cunff L, Dereeper A, Legrand D, Sabot F, Bouchez O, et al.  
749 Transposable Elements Are a Major Cause of Somatic Polymorphism in *Vitis vinifera* L.  
750 PLoS ONE. 2012;7(3):e32973.
- 751 59. Gambino G, Dal Molin A, Boccacci P, Minio A, Chitarra W, Avanzato CG, et al.  
752 Whole-genome sequencing and SNV genotyping of 'Nebbiolo' (*Vitis vinifera* L.) clones.  
753 Scientific Reports. 2017;7(1):17294.
- 754 60. Chaisson MJ, Tesler G. Mapping single molecule sequencing reads using basic local  
755 alignment with successive refinement (BLASR): application and theory. BMC Bioinformatics.  
756 2012;13(1):238.
- 757 61. Fallon TR, Lower SE, Chang C-H, Bessho-Uehara M, Martin GJ, Bewick AJ, et al.  
758 Firefly genomes illuminate the origin and evolution of bioluminescence. bioRxiv.  
759 2017:237586.
- 760 62. Chen J, Hu Q, Zhang Y, Lu C, Kuang H. P-MITE: a database for plant miniature  
761 inverted-repeat transposable elements. Nucleic Acids Research. 2014;42(Database  
762 issue):D1176-81.
- 763 63. Smit A, Hubley R. RepeatModeler Open-1.0. 2008-2015 [Available from:  
764 <http://www.repeatmasker.org>.
- 765 64. Dobin A, Davis CA, Schlesinger F, Drenkow J, Zaleski C, Jha S, et al. STAR:  
766 ultrafast universal RNA-seq aligner. Bioinformatics. 2013;29(1):15-21.
- 767 65. Trapnell C, Williams BA, Pertea G, Mortazavi A, Kwan G, van Baren MJ, et al.  
768 Transcript assembly and quantification by RNA-Seq reveals unannotated transcripts and  
769 isoform switching during cell differentiation. Nature biotechnology. 2010;28(5):511-5.
- 770 66. Keller O, Kollmar M, Stanke M, Waack S. A novel hybrid gene prediction method  
771 employing protein multiple sequence alignments. Bioinformatics. 2011;27(6):757-63.
- 772 67. Li L, Stoeckert CJ, Roos DS. OrthoMCL: Identification of Ortholog Groups for  
773 Eukaryotic Genomes. Genome Research. 2003;13(9):2178-89.

- 774 68. Kanehisa M, Goto S. KEGG: kyoto encyclopedia of genes and genomes. *Nucleic*  
775 *Acids Research*. 2000;28(1):27-30.
- 776 69. Camacho C, Coulouris G, Avagyan V, Ma N, Papadopoulos J, Bealer K, et al.  
777 BLAST+: architecture and applications. *BMC Bioinformatics*. 2009;10:421.
- 778 70. Pundir S, Martin MJ, O'Donovan C. UniProt Protein Knowledgebase. In: Wu CH,  
779 Arighi CN, Ross KE, editors. *Protein Bioinformatics: From Protein Modifications and*  
780 *Networks to Proteomics*. New York, NY: Springer New York; 2017. p. 41-55.
- 781 71. The UniProt Consortium. UniProt: the universal protein knowledgebase. *Nucleic*  
782 *Acids Research*. 2017;45(D1):D158-D69.
- 783 72. Kurtz S, Phillippy A, Delcher AL, Smoot M, Shumway M, Antonescu C, et al.  
784 Versatile and open software for comparing large genomes. *Genome biology*. 2004;5(2):R12.
- 785 73. Li H. Aligning sequence reads, clone sequences and assembly contigs with BWA-  
786 MEM. arXiv:13033997v1. 2013.
- 787 74. Koboldt DC, Zhang Q, Larson DE, Shen D, McLellan MD, Lin L, et al. VarScan 2:  
788 Somatic mutation and copy number alteration discovery in cancer by exome sequencing.  
789 *Genome Research*. 2012;22(3):568-76.
- 790 75. Marçais G, Kingsford C. A fast, lock-free approach for efficient parallel counting of  
791 occurrences of k-mers. *Bioinformatics*. 2011;27(6):764-70.
- 792 76. Edgar RC. MUSCLE: a multiple sequence alignment method with reduced time and  
793 space complexity. *BMC Bioinformatics*. 2004;5:113.
- 794 77. Larsson A. AliView: a fast and lightweight alignment viewer and editor for large  
795 datasets. *Bioinformatics*. 2014;30(22):3276-8.
- 796 78. Paradis E, Claude J, Strimmer K. APE: Analyses of Phylogenetics and Evolution in R  
797 language. *Bioinformatics*. 2004;20(2):289-90.
- 798 79. Schliep KP. phangorn: phylogenetic analysis in R. *Bioinformatics*. 2011;27(4):592-3.

799 80. Bolger AM, Lohse M, Usadel B. Trimmomatic: a flexible trimmer for Illumina  
800 sequence data. *Bioinformatics*. 2014;30(15):2114-20.

## 801 **Supporting information**

802 **S1\_Table.pdf: BUSCO analysis of the Chardonnay FALCON Unzip assembly before**  
803 **and after curation.**

804 **S2\_Fig.pdf: Redundant primary contig reduction.** Circular representations of **A)** FALCON  
805 Unzip Chardonnay assembly and **B)** the same assembly after curation. Tracks are: length-  
806 ordered contigs **(i)**, read-depth of mapped Illumina paired end reads **(ii)** and heterozygous  
807 SNPs density **(iii)**.

808 **S3\_Fig.pdf: Gene expansion of Chardonnay Chromosome 5 (primary contigs) region**  
809 **containing FAR2-like genes.** Alignments are indicated as black lines (dotplot), the ORFs  
810 for FAR2-like genes and pseudogenes are indicated for both Pinot noir and Chardonnay.

811 **S4\_Fig.pdf: Distribution of clonal markers over the Chardonnay assembly.** Chardonnay  
812 chromosome-ordered primary contigs **(i)** and clonal marker variants **(ii)**.

813 **S5\_Dataset.xlsx: Chardonnay clonal-specific markers. Sheet 1)** Chardonnay clone-  
814 specific markers with read-counts, **Sheet 2)** markers in gene models with Annovar and  
815 Provean predictions, **Sheet 3)** Summaries of clonal marker detection screening against  
816 validation datasets.

817 **S6\_Archive.tar.gz: Scripts and workflows for data analysis.** Extract with tar for linux or  
818 Mac, or 7zip (7zip.org) for Windows. Contents: **bin/**, All custom scripts used for analysis; **lib/**,  
819 Custom Perl library for scripts; **src/**, Source code for window coverage masking program;  
820 **workflows/**, Commands used with comments for all data analysis; **Makefile**, The GNU  
821 Make pipeline for marker discovery.
